# Supplementary material
Source: PubMed Central journal article supplement (PMC7456461)
Supplement: NIHMS1612332-supplement-Suppl_Tables_1-4.pdf [file NIHMS1612332-supplement-Suppl_Tables_1-4.pdf]

In the format provided by the authors and unedited.

# Antibody-mediated delivery of viral epitopes to tumors harnesses CMV-specific T cells for cancer therapy

David G. Millar<sup>1</sup>, Rakesh R. Ramjiawan<sup>2</sup>, Kosuke Kawaguchi<sup>2</sup>, Nisha Gupta<sup>2</sup>, Jiang Chen<sup>2</sup>, Songfa Zhang<sup>1</sup>, Takashi Nojiri<sup>2</sup>, William W. Ho<sup>2</sup>, Shuichi Aoki<sup>2</sup>, Keehoon Jung<sup>2</sup>, Ivy Chen<sup>2</sup>, Feng Shi<sup>1</sup>, James M. Heather<sup>1</sup>, Kohei Shigeta<sup>2</sup>, Laura T. Morton<sup>3</sup>, Sean Sepulveda<sup>1</sup>, Li Wan<sup>1</sup>, Ricky Joseph<sup>3</sup>, Eleanor Minogue<sup>1</sup>, Ashok Khatri<sup>1</sup>, Aditya Bardia<sup>4</sup>, Leif W. Ellisen<sup>1</sup>, Ryan B. Corcoran<sup>1</sup>, Aaron N. Hata<sup>1</sup>, Sara I. Pai<sup>5</sup>, Rakesh K. Jain<sup>2</sup>, Dai Fukumura<sup>2</sup>, Dan G. Duda<sup>2</sup> and Mark Cobbold<sup>1\*</sup>

---

<sup>1</sup>Massachusetts General Hospital Cancer Center and Department of Medicine, Harvard Medical School, Boston, MA, USA. <sup>2</sup>Steele Laboratories, Department of Radiation Oncology, Harvard Medical School, Boston, MA, USA. <sup>3</sup>Medical Research Council Centre for Immune Regulation and Clinical Immunology Service, School of Immunity and Infection, College of Medicine and Dental Sciences, University of Birmingham, Birmingham, UK. <sup>4</sup>Massachusetts General Hospital, Boston, MA, USA. <sup>5</sup>Division of Surgical Oncology, Department of Surgery, Massachusetts General Hospital, Harvard Medical School, Boston, MA, USA. \*e-mail: [mcobbold@mgh.harvard.edu](mailto:mcobbold@mgh.harvard.edu)

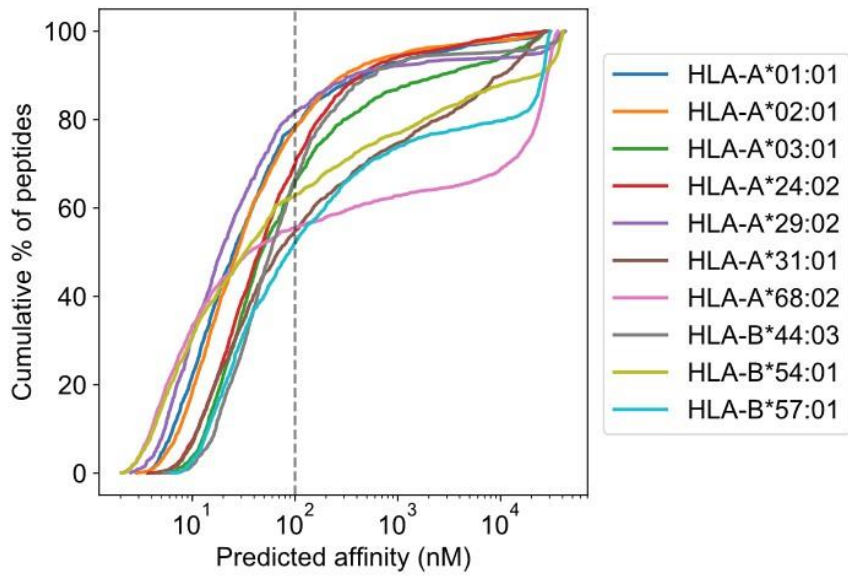

**Supplementary Figure 1**

Predicted affinities of HLA-bound peptides.

In silico prediction of peptides eluted from HLA molecules.

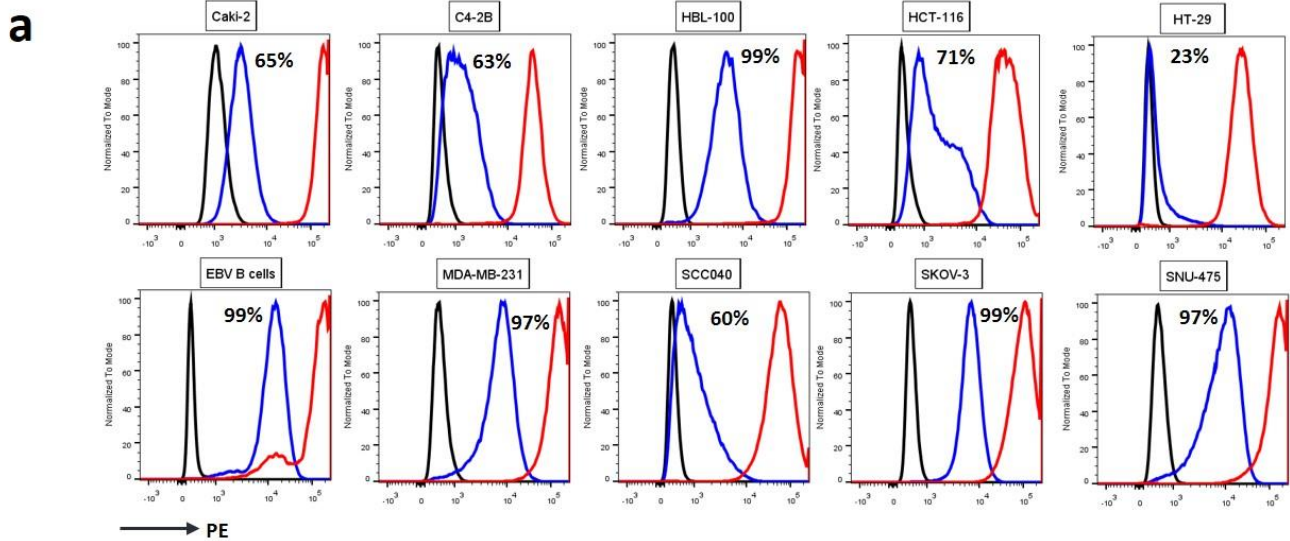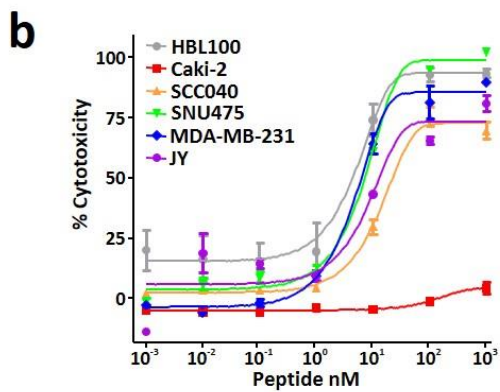

### Supplementary Figure 2

Presence of empty HLA molecules at the surface of tumor cell lines that can be loaded with exogenous CMV peptide with tumor cell cytotoxicity.

**(a)** Ten tumor cell lines labelled with antibodies specific for peptide-loaded HLA (red line) and empty HLA molecules (blue line) compared with control stained cells (black line). Percentages shown are percentage cells positive for empty HLA molecules (HC10) staining. All cell lines tested were 100% positive for peptide-loaded HLA (W6/32). Staining was repeated (n=3) in selected cell lines. **(b)** Five HLA-A2+ cell lines lysed by peptide-specific CMV-CTL and no lysis of HLA-A2- cell line (Caki-2) (n=3 independent samples). Data represented as mean and error bars represent standard error of the mean.

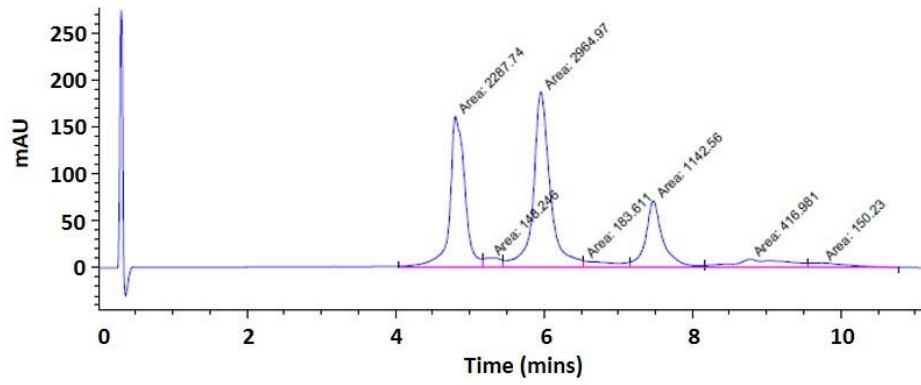

| Drug antibody ratio | Area    | Conjugation (%) |
|---------------------|---------|-----------------|
| 0                   | 2287.74 | 31.36           |
| 2                   | 2964.97 | 40.64           |
| 4                   | 1142.58 | 15.66           |
| 6                   | 416.98  | 5.71            |
| 8                   | 150.23  | 2.04            |

### Supplementary Figure 3

Assessment of peptide antibody ratio conjugation.

The number of peptides conjugated to each antibody was assessed by high pressure liquid chromatography (HPLC). Data from single experiment.

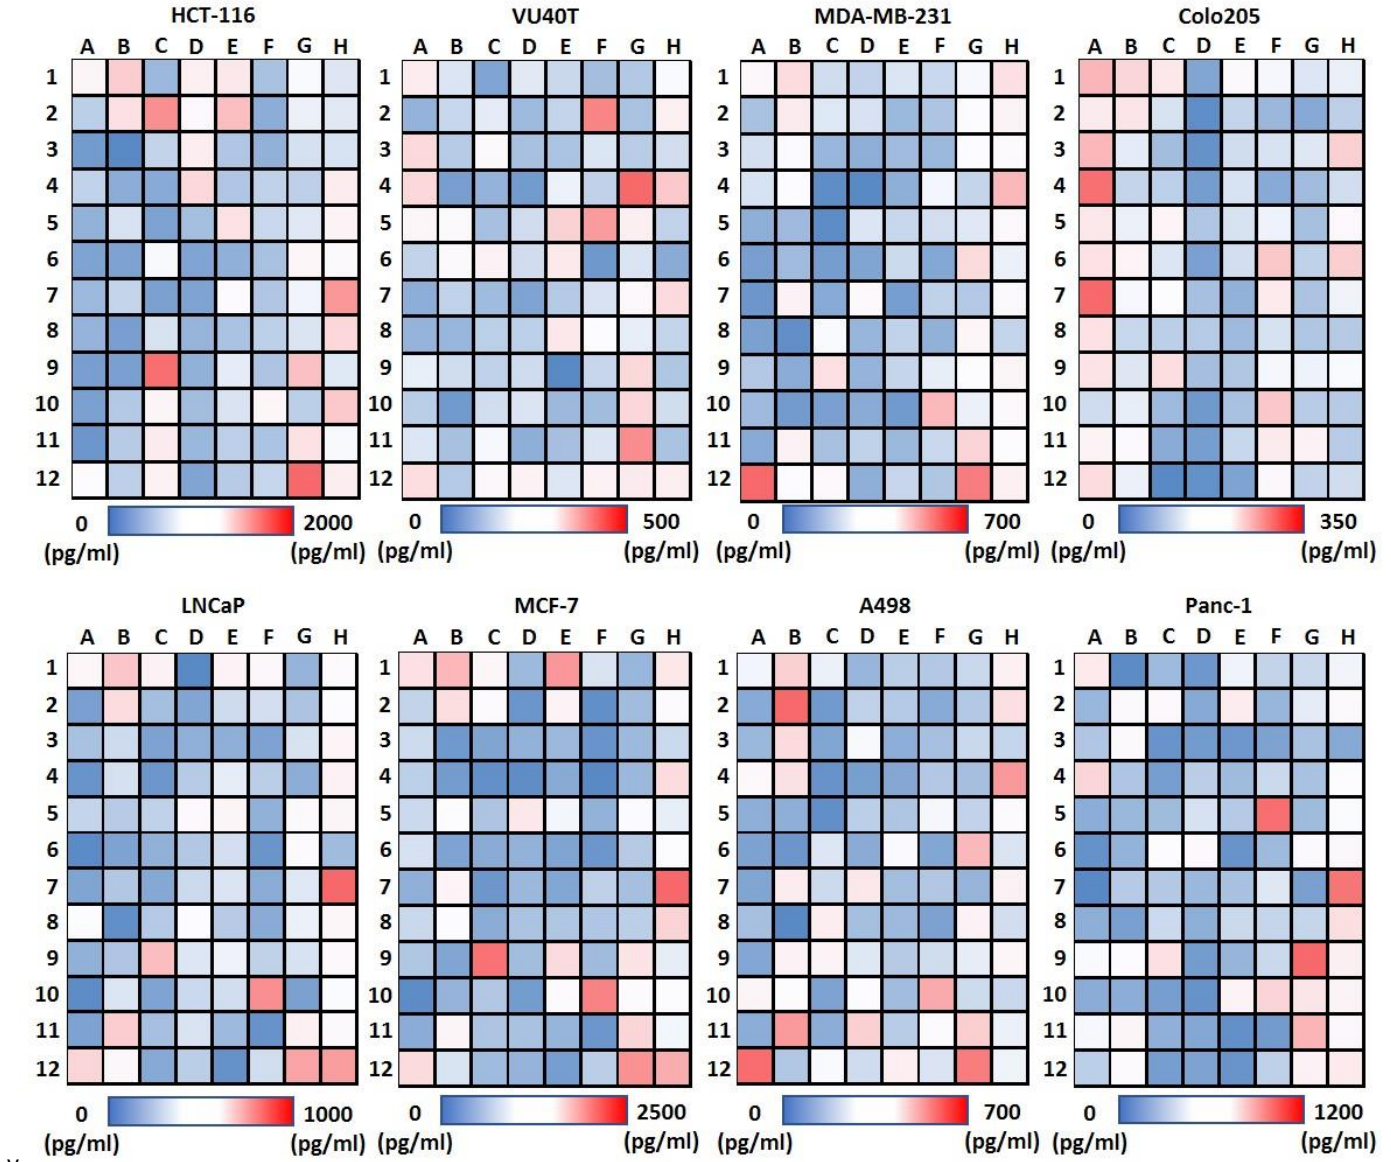

**Supplementary Figure 4**

Screening 96 APECs in multiple tumor cell lines.

Eight tumor cell lines are labelled with cAPECs and cytokine release by peptide-specific T cells assayed.

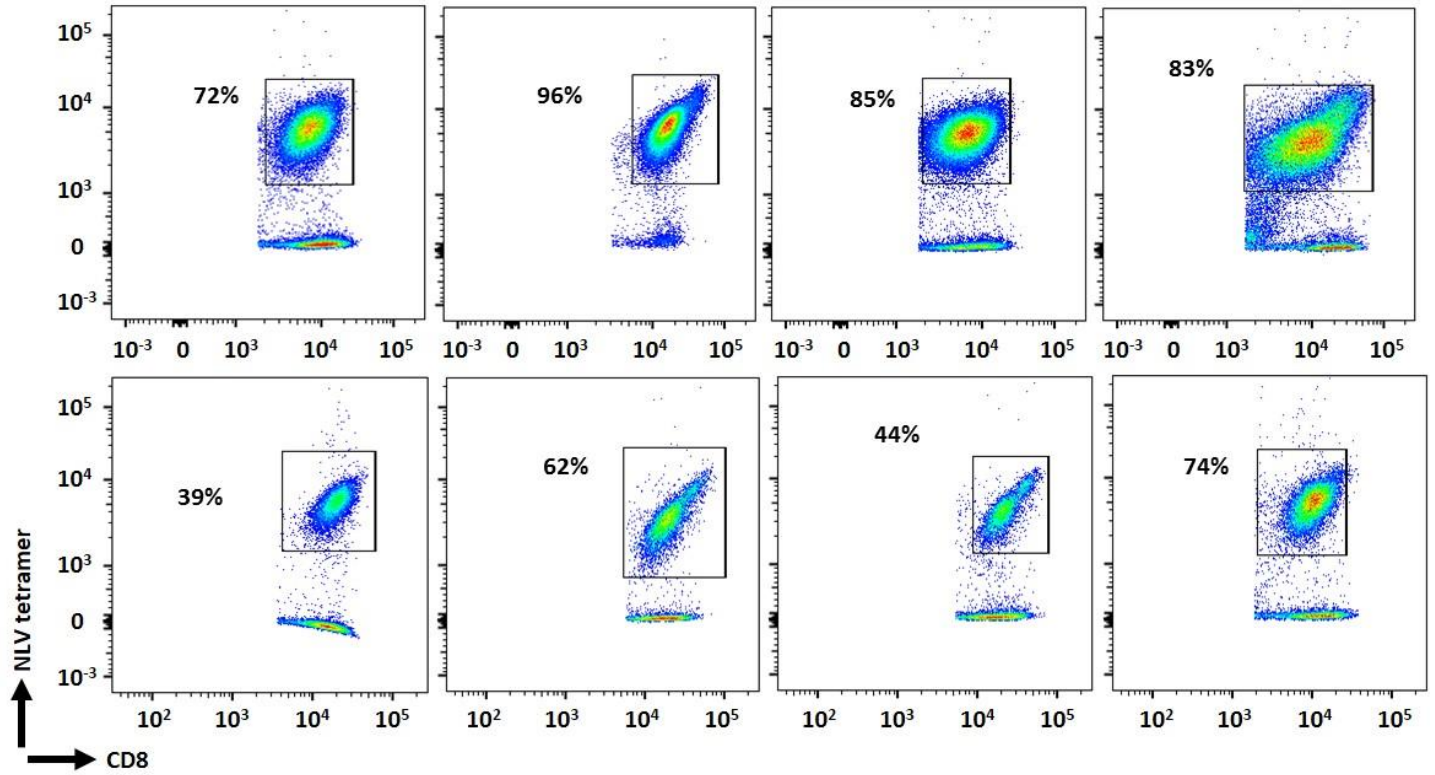

**Supplementary Figure 5**

Peptide specificity of *ex vivo* cultured T cell lines.

Flow cytometric analysis of *ex vivo* cultured T cell lines used for *in vitro* assays using HLA-peptide tetramers. Cell lines were cultured at various times and each cell line was analyzed for tetramer positive T cells once.

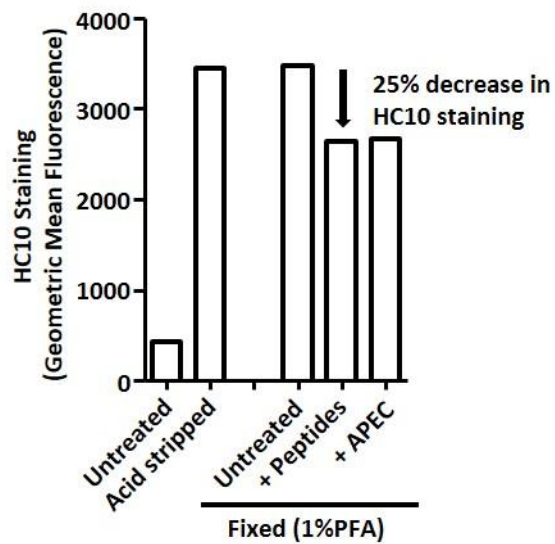

### Supplementary Figure 6

Analysis of empty MHC molecules using HC10 antibody staining.

Colo205 Tumor cells were assayed for the presence and decrease in the amount of empty MHC molecules at the cell surface by HC10 staining. Cells were acid-stripped to remove peptides from surface MHC molecules, lightly fixed or left untreated and incubated with either peptide or APEC before HC10 staining.

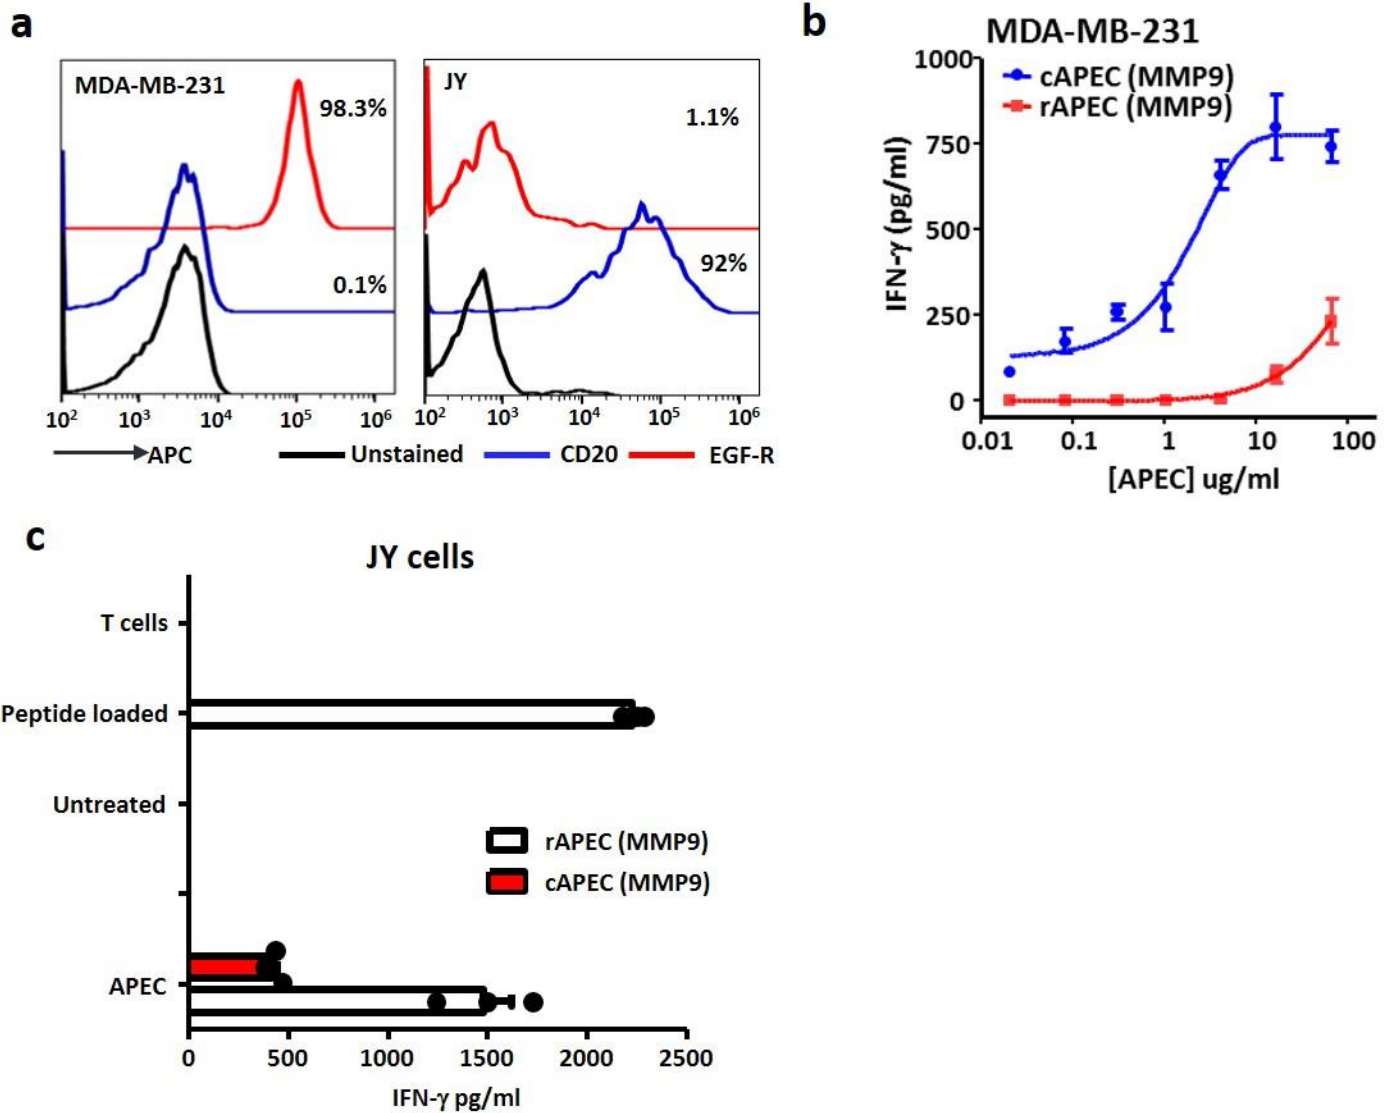

### Supplementary Figure 7

APEC binding to tumor cell surface essential for T cell recognition.

**(a)** Flow cytometric analysis of EGF-R and CD20 expression on MDA-MB-231 and JY tumor cell lines. Staining was repeated  $n=3$ . **(b)** Surface binding of APEC is required for antigenic reprogramming and can be inhibited by the pre-treatment with unconjugated antibody ( $n=3$  independent samples). Data represented as mean and error bars represent standard error of the mean. **(c)** CD20+ tumor cells labelled with cAPEC or rAPEC (350nM) and demonstrating T cell activation only when bound by the anti-CD20 rAPEC. Peptide loaded ( $1\mu\text{M}$ ) target cells were used to determine efficacy of T cells ( $n=3$  independent samples). Data represented as mean and error bars represent standard error of the mean.



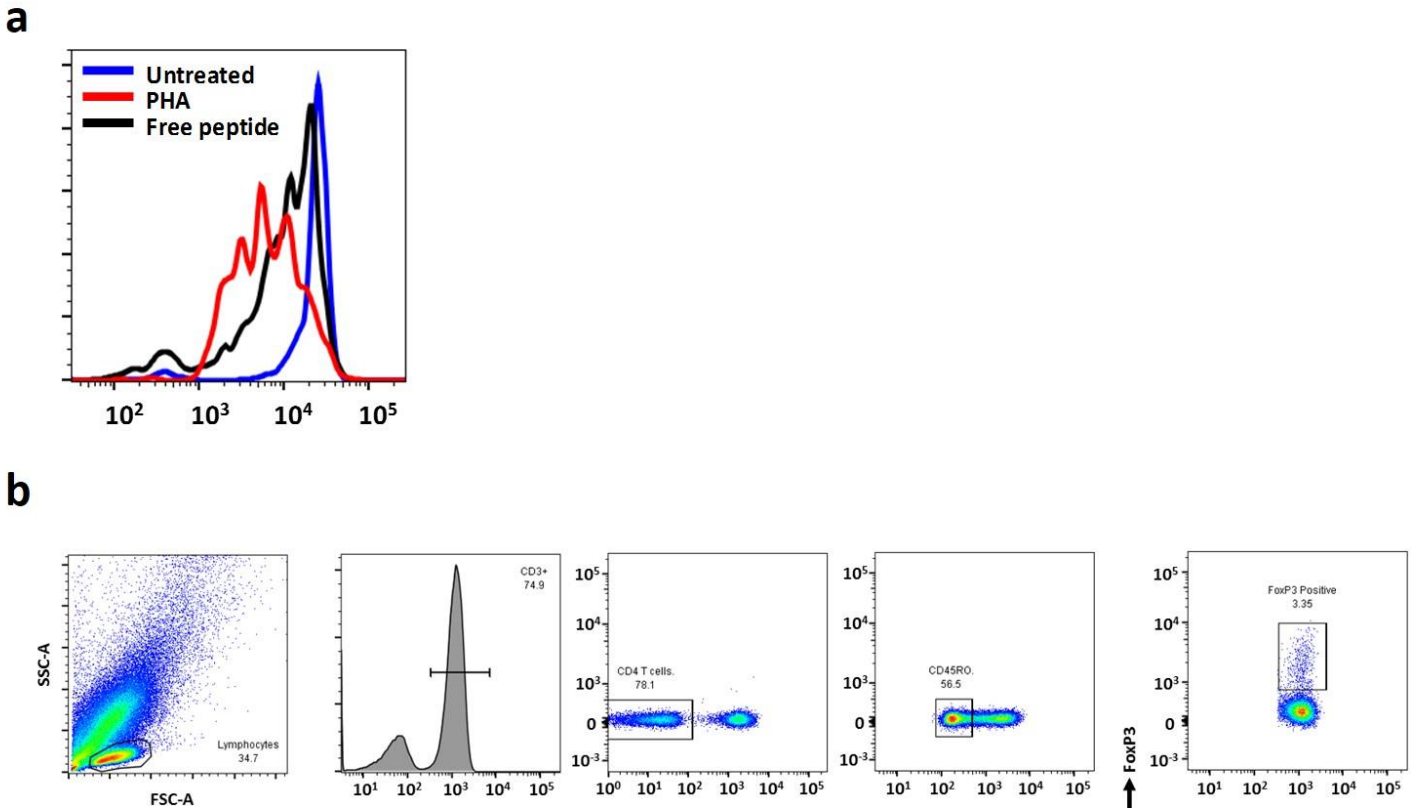

**Supplementary Figure 8**

Flow cytometric analysis of T cell proliferation and regulatory T cells.

**(a)** Flow cytometric staining to allow analysis of T cell proliferation after treatment with free peptide (black), phytohaemagglutinin (PHA, red) or untreated T cells (blue) (data from single experiment). **(b)** Flow cytometric staining to allow analysis of CD4+ CD45RO FoxP3+ regulatory T cells (data from single experiment).

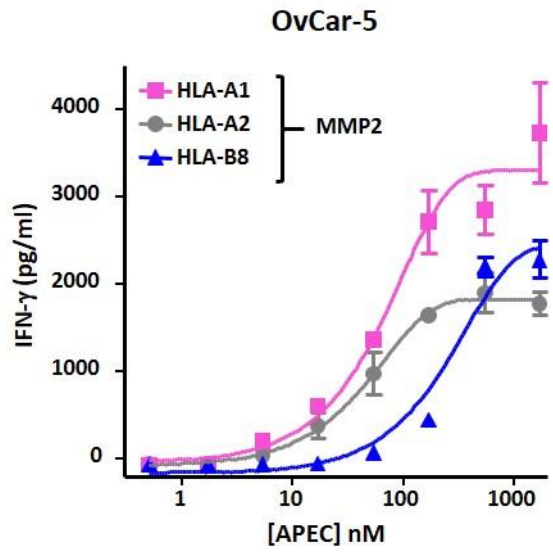

**Supplementary Figure 9**

Expanding APEC to include peptides that bind to other HLA alleles.

APECs conjugated with CMV epitopes covering multiple HLA alleles are able to activate and trigger cytokine release of peptide-specific CMV-CTL (n=3 independent samples). Data represented as mean and error bars represent standard error of the mean.

**a** Concatemer peptide APEC

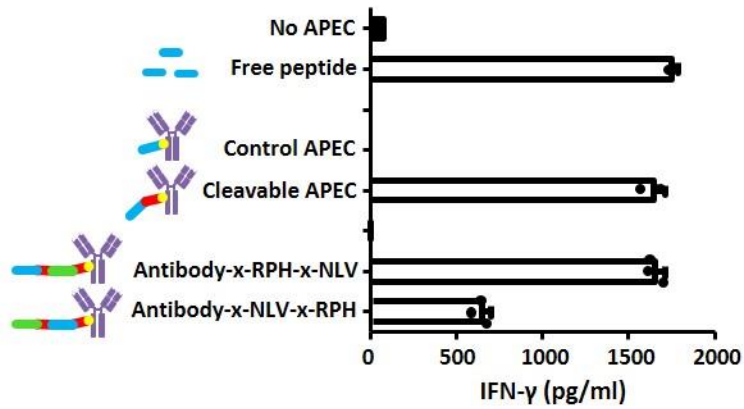

**b** Multiple peptide APEC

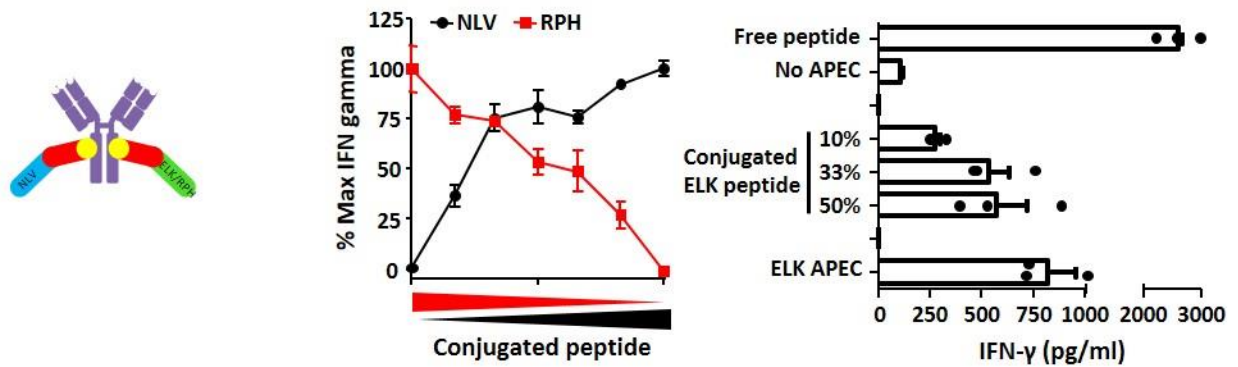

**c** Branched APEC

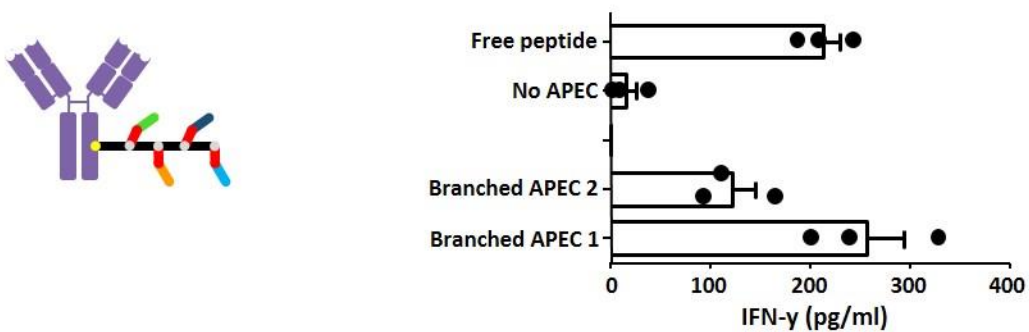

Supplementary Figure 10

Construction of APECs containing multiple T-cell epitopes (polytopes).

We tested whether it was possible to generate APECs that contained multiple T-cell epitope peptide payloads. **(a)** The initial concatemer design utilized linear peptides with tandem T-cell epitopes (NLV and RPH) juxtaposed by proteolytic cleavage sequences (-x-). Using T-cells against each epitope, both epitopes elicited T-cell responses (n=3 independent samples). Data represented as mean and error bars represent standard error of the mean. A second method **(b)** involved the mixed conjugation of peptides to antibodies. In this case the peptide payloads were the same as original APEC design, but two different peptides (with 7-different ratios) were conjugated onto a single APEC. These mixed APECs were able to activate the two different T-cell populations (NLV or RPH) but with varying potency. In a separate experiment three different ratios were tested against two different epitopes (NLV and ELK) which gave concordant results (n=3 independent samples). Data represented as mean and error bars represent standard error of the mean.. Lastly, we created a single APEC species that was conjugated to a branched peptide that contained multiple different cleavable peptides **(c)**. These branched peptides were able to activate T-cell populations (n=3 independent samples). Data represented as mean and error bars represent standard error of the mean.

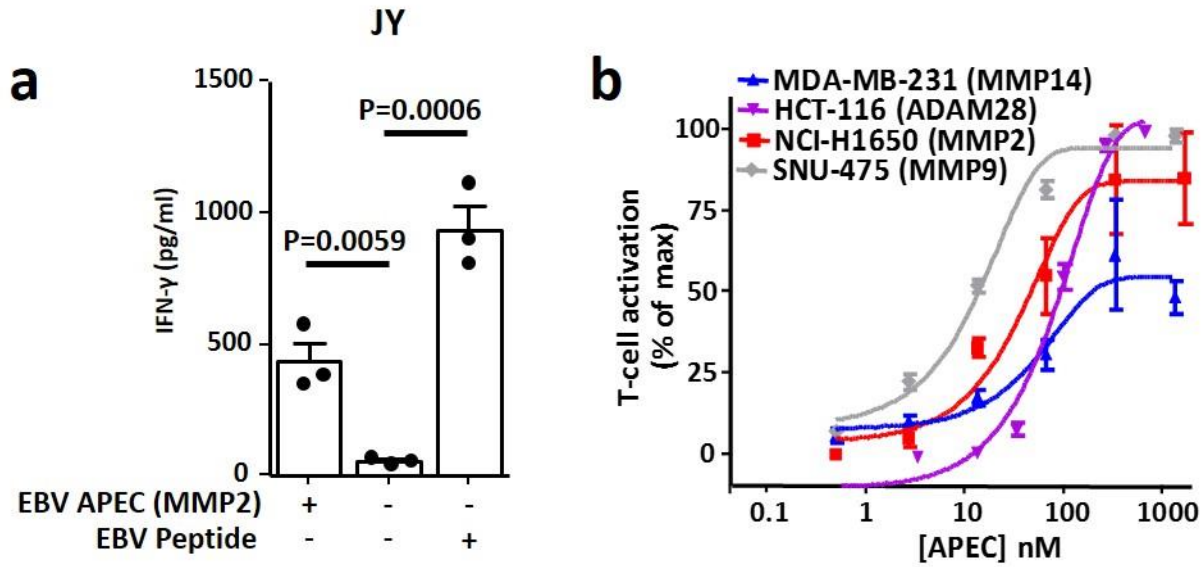

**Supplementary Figure 11**

EBV-specific T cells can be re-directed to target tumor cells using APEC and CMV-CTL activation using different proteases to cleave APECs.

**(a)** Tumor cells treated with APEC conjugated with EBV-derived epitopes are recognised by EBV-specific T cells (n=3 independent samples). Data represented as mean and error bars represent standard error of the mean. Significance was determined by unpaired two-tailed t-test. **(b)** Multiple tumor types can be recognized by peptide-specific T cells after treatment with cAPEC containing ADAM28, MMP2, MMP9 or MMP14 cleavable peptides (n=3 independent samples). Data represented as mean and error bars represent standard error of the mean.

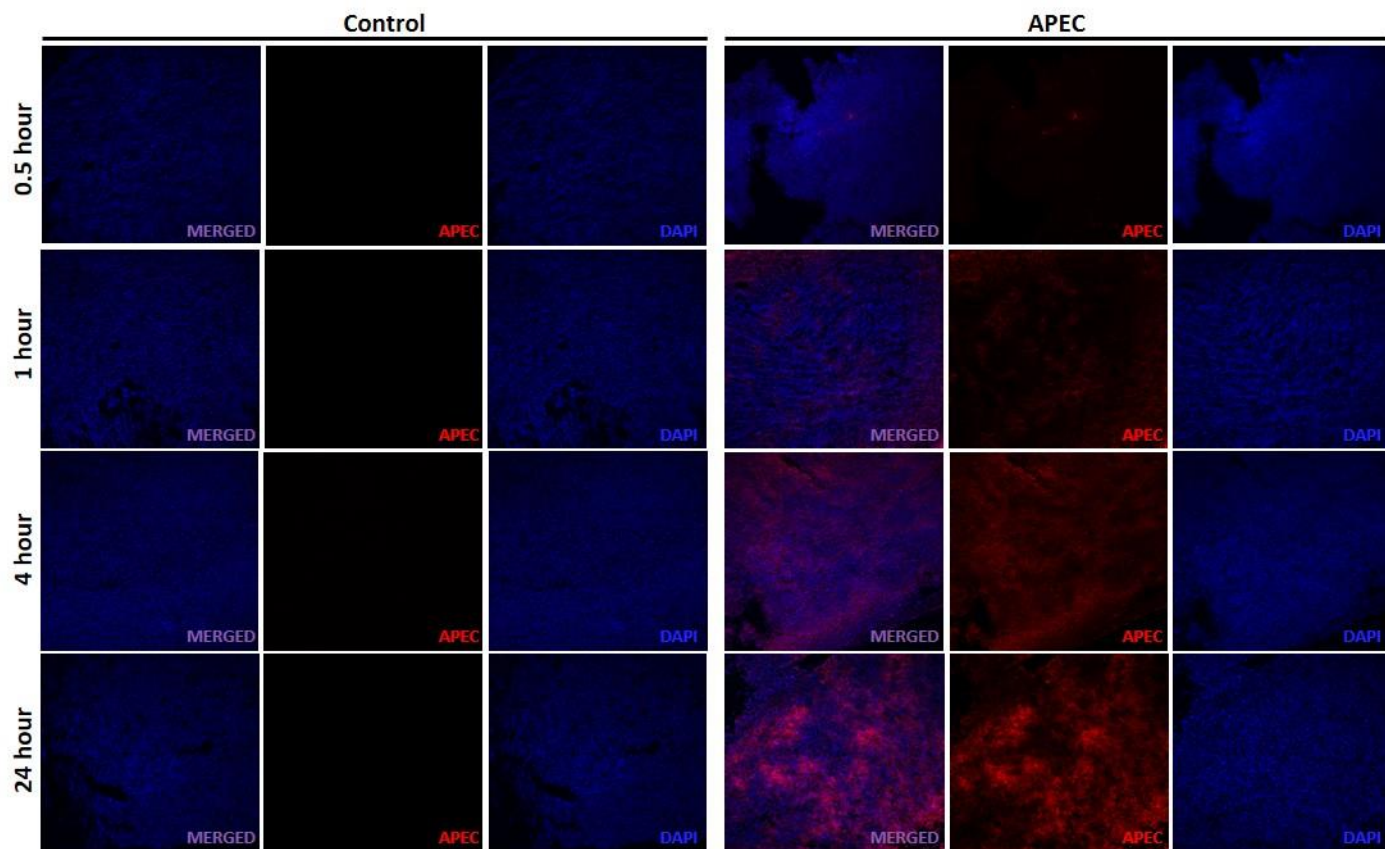

**Supplementary Figure 12**

Tumor penetration of APEC in orthotopic breast cancer model.

Tumor-bearing NOD/SCID mice (n=5) were injected with either PBS or MMP14-cAPEC and tumors resected at timepoints up to 24h. Tumors were taken for immunofluorescence to stain for the presence of APEC.

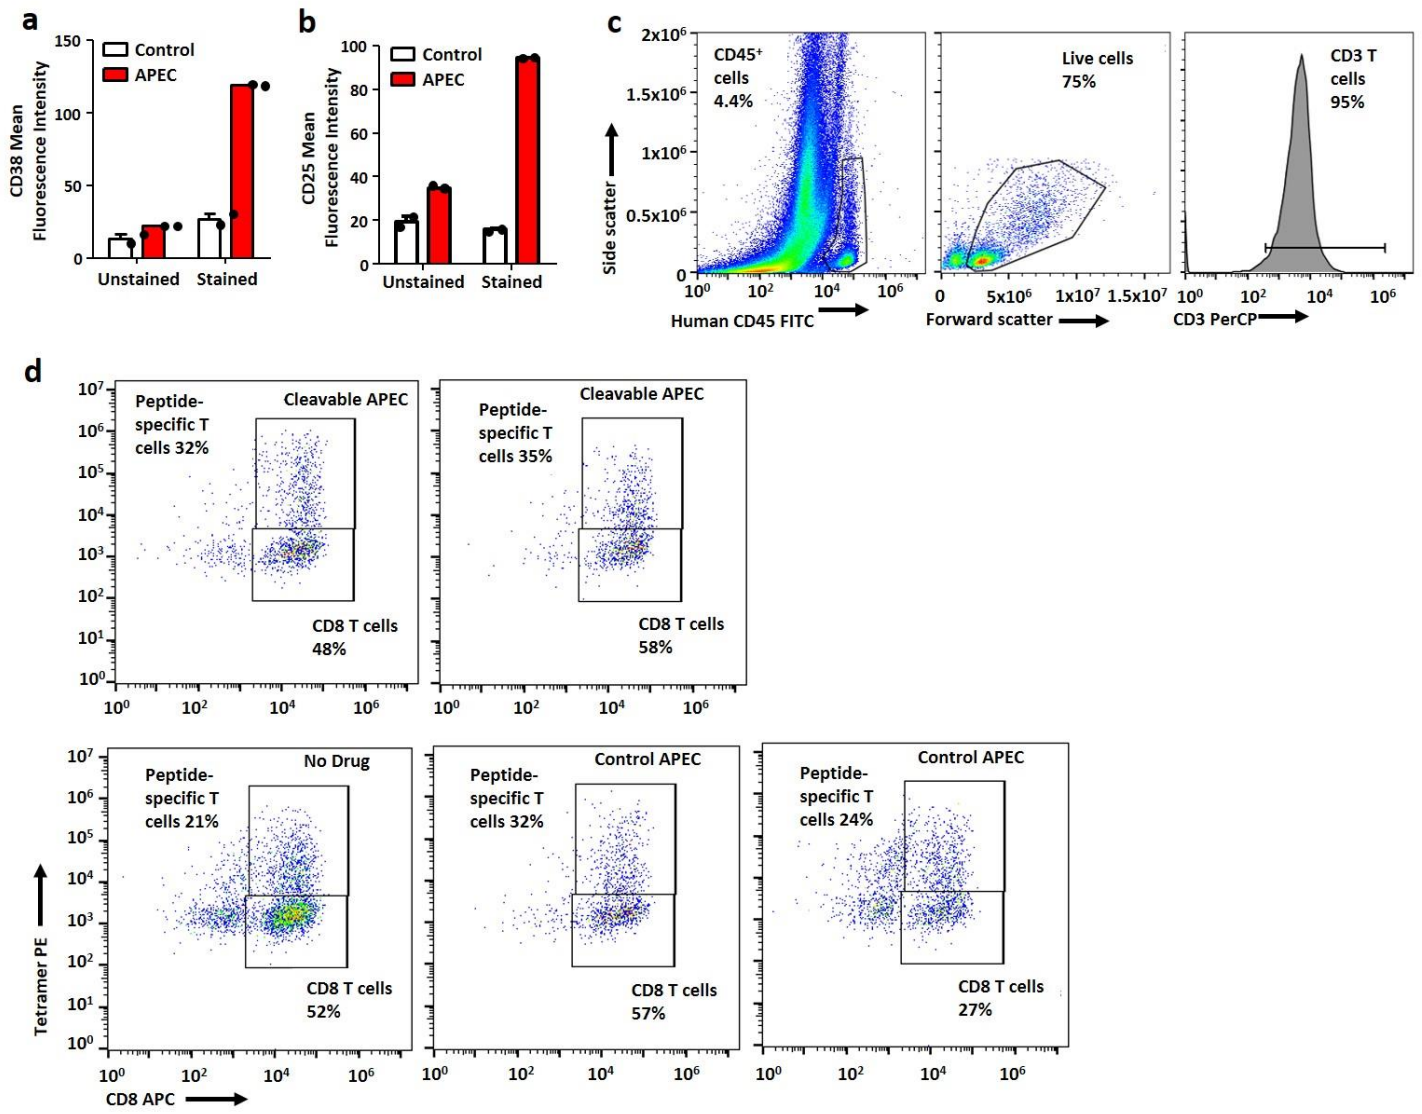

### Supplementary Figure 13

In vivo T cell activation by APEC in orthotopic breast cancer model and the presence of peptide-specific T cells within tumors.

Breast cancer tumor-bearing mice were injected intratumorally with freshly isolated peptide-specific CMV-CTL and 24h post-injection, tumors were resected and T cells isolated. Flow cytometric analysis of intratumoral CD3<sup>+</sup> T cells was undertaken for the presence of T cell activation markers (a) CD38 (n=2 independent samples) and (b) CD25 (n=2 independent samples). Data represented as mean and error bars represent standard error of the mean. (c) Gating strategy to select human T cells from the excised tumor sample. Firstly, CD45<sup>+</sup> was used to gate human lymphocytes before live cells were gated using forward and side scatter. T cells were then gated using CD3. (d) Peptide-specific T cells were labelled using HLA-peptide tetramer complexes conjugated to phycoerythrin (PE) and the cells were co-labeled with CD8 APC (data from single experiment).





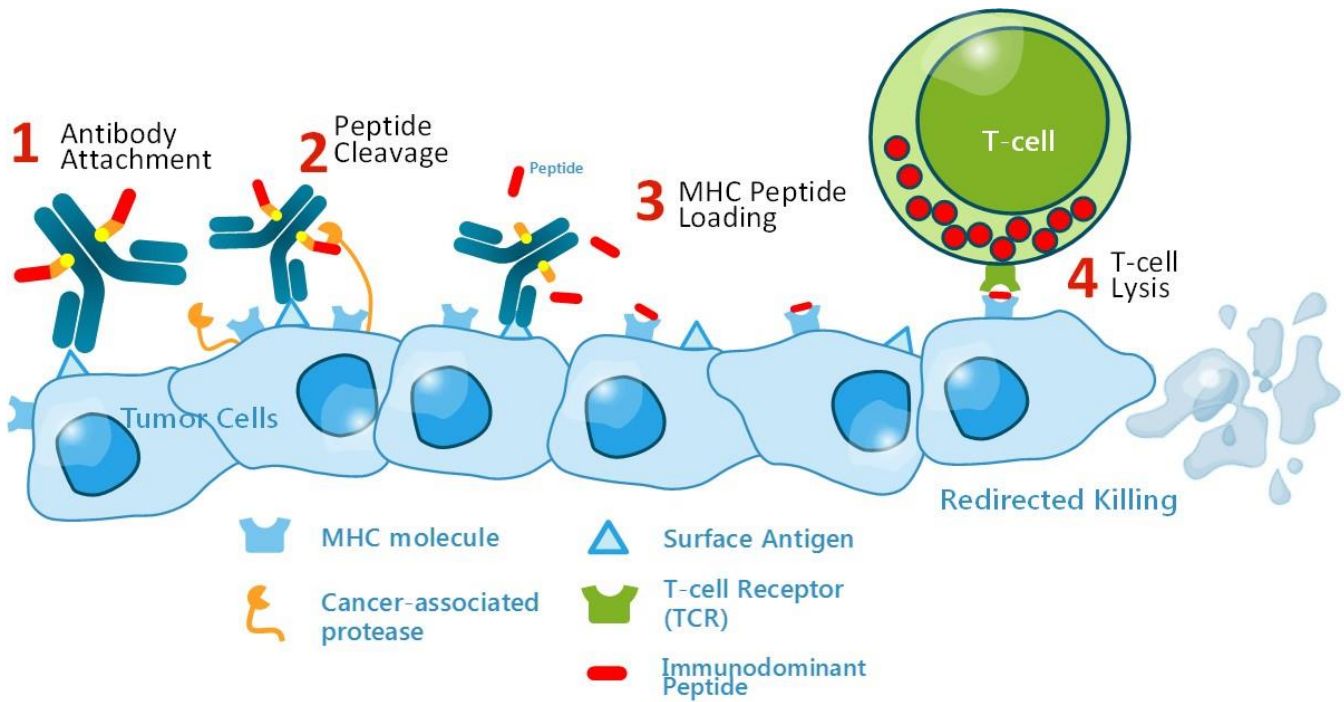

### Supplementary Figure 15

APEC mechanism of action.

Proposed mechanism of action for APEC with antibody attachment to target antigen (1), release of virus-derived epitope at the cell surface (2). Released peptide loads into empty MHC class I molecule at the cell surface (3) and T cell lysis by the re-directed anti-viral immune response.

**Table S1**

| Protein | Sequence    | Position | HLA restriction |
|---------|-------------|----------|-----------------|
| pp65    | YSEHPTFTSQY | 363–373  | HLA-A1          |
| pp50    | VTEHDTLly   | 245–253  | HLA-A1          |
| IE1     | YILEETSVM   | 315–323  | HLA-A2          |
| pp65    | NLVPMVATV   | 495–503  | HLA-A2          |
| IE1     | VLEETSVMl   | 316–324  | HLA-A2          |
| pp50    | TVRSHCVSK   | 52–60    | HLA-A3          |
| pp65    | TPRVTGGGAM  | 417–426  | HLA-B7          |
| pp65    | RPHERNGFTVL | 265–275  | HLA-B7          |
| IE-1    | QJKVRVDMV   | 88-96    | HLA-B8          |
| IE1     | ELRRKMMYM   | 199–207  | HLA-B8          |
| IE1     | ELKRKMIYM   | 199–207  | HLA-B8          |

**Table S1.** CMV peptides used for tetramer staining and their HLA restriction.

**Table S2**

| Peptide | Sequence           | Protease                       | Peptide | Sequence           | Protease                    | Peptide | Sequence                | Protease    |
|---------|--------------------|--------------------------------|---------|--------------------|-----------------------------|---------|-------------------------|-------------|
| A1      | YLGRSYKVNLPVMVATV  | C1s                            | C9      | HPVGLLARNLPVMVATV  | MMP2                        | F5      | RNLVPMVATV              | Trypsin     |
| A2      | FNKLNLPVMVATV      | Cathepsin B                    | C10     | KGPLGVRGNLPVMVATV  | MMP2                        | F6      | RNLVPMVATV              | Trypsin     |
| A3      | GGGGFNLPVMVATV     | Cathepsin B                    | C11     | PLGLAGNLPVMVATV    | MMP2                        | F7      | GGSGRSANANLPVMVATV      | uPA         |
| A4      | PRSFRLGKKNLPVMVATV | Cathepsin D                    | C12     | PLGLWANLPVMVATV    | MMP2                        | F8      | SGRSANAKNLPVMVATV       | uPA         |
| A5      | EVLWSAVNLPVMVATV   | Cathepsin G                    | D1      | PLGVRGNLPVMVATV    | MMP2                        | F9      | SGRSANLPVMVATV          | uPA         |
| A6      | PVSLYRCNLPVMVATV   | Cathepsin G                    | D2      | AIPVSLRNLPVMVATV   | MMP2                        | F10     | SRRRVNSLNLPVMVATV       | uPA         |
| A7      | AAPVNLPVMVATV      | Elastase 2                     | D3      | PQGIAMGNLPVMVATV   | MMP2                        | F11     | CPGRVVGGNLPVMVATV       | uPa / tPA   |
| A8      | TSQVNGLNLPVMVATV   | Elastase 2                     | D4      | CGLDDNLPVMVATV     | MMP2/9                      | F12     | PRGMASNLPVMVATV         | MMP9        |
| A9      | TPEHVVPYNLPVMVATV  | Endothelin-converting enzyme 1 | D5      | GPLGIAGQNLVPVMVATV | MMP2/9                      | G1      | PLGVRGNLPVMVATV         | MMP2/9      |
| A10     | PQGRIVGGNLPVMVATV  | Hepsin                         | D6      | GPLGMLSQNLVPVMVATV | MMP2/9                      | G2      | PLGLAGNLPVMVATV         | MMP2/9      |
| A11     | PRFKIIGNLPVMVATV   | Hepsin                         | D7      | PLGLNLPVMVATV      | MMP2/9                      | G3      | PQGLAGNLPVMVATV         | MMP9        |
| A12     | GKAFFRRLNLPVMVATV  | Hk2                            | D8      | PVGLIGNLPVMVATV    | MMP2/9                      | G4      | GPQGARGQNLVPVMVATV      | MMP9        |
| B1      | AANLNLPVMVATV      | Legumain                       | D9      | GPQGIWQNLVPVMVATV  | MMP2/9, MT1-MMP             | G5      | PLGLYLNLPVMVATV         | MMP2/9      |
| B2      | SLGRKIQLNLPVMVATV  | MASP2                          | D10     | QPVGINTSNLPVMVATV  | MMP3 (stromelysin-1)        | G6      | PLGLYALNLPVMVATV        | MMP2/9      |
| B3      | APPPVLLNLPVMVATV   | Matrilysin (MMP7)              | D11     | STAVIVSANLPVMVATV  | MMP3 (stromelysin-1)        | G7      | AAALGNVAPNLPVMVATV      | MMP9        |
| B4      | IPENFFGNLPVMVATV   | Matrilysin (MMP7)              | D12     | VASSSTAVNLPVMVATV  | MMP3 (stromelysin-1)        | G8      | GTQFFNLPVMVATV          | Cathepsin D |
| B5      | LRELHLDNLPVMVATV   | Matrilysin (MMP7)              | E1      | GPLGLARKNLPVMVATV  | MMP7                        | G9      | GSTFFNLPVMVATV          | Cathepsin D |
| B6      | MLEDEASGNLPVMVATV  | Matrilysin (MMP7)              | E2      | RPLALWRSNLPVMVATV  | MMP7                        | G10     | QVVAGNLPVMVATV          | Cathepsin B |
| B7      | KQSRKFVNPVPMVATV   | Matriptase(ST14)               | E3      | NKSRRLGNLPVMVATV   | MMP7/ Cathpsin B            | G11     | TYRSRYLNLPVMVATV        | uPA         |
| B8      | RQARVVGGNLPVMVATV  | Matriptase2 /Hepsin            | E4      | GPQGIAGQRNLPVMVATV | MMP9                        | G12     | NSGRAVTYNLPVMVATV       | uPA         |
| B9      | GPLGLWAQNLVPVMVATV | MMP (esp 2/9)                  | E5      | KPVLSYRNLPVMVATV   | MMP9                        | H1      | PSSRRRVNLPVMVATV        | uPA         |
| B10     | PVSLRNLPVMVATV     | MMP1                           | E6      | PLGMTSNLPVMVATV    | MMP9                        | H2      | PMKRLTLGNLPVMVATV       | Cathepsin B |
| B11     | AAATSIAMNLPVMVATV  | MMP11 (stromelysin-3)          | E7      | PRALMNLPVMVATV     | MMP9                        | H3      | DDDKIVGGNLPVMVATV       | Cathepsin B |
| B12     | AAGAMFLENLPVMVATV  | MMP11 (stromelysin-3)          | E8      | GPLPLRNLPVMVATV    | MT1-MMP                     | H4      | HLVEALYNLPVMVATV        | Cathepsin B |
| C1      | EAAAATSNLPVMVATV   | MMP11 (stromelysin-3)          | E9      | KQLRVVNGNLPVMVATV  | MT-SP1 / ST14/ uPA / Hepsin | H5      | EVDLLIGSNLPVMVATV       | Cathepsin B |
| C2      | PRHLRNLPVMVATV     | MMP14                          | E10     | PLGLYANLPVMVATV    | Pan-MMP                     | H6      | PRFKIIGGNLPVMVATV       | Cathepsin B |
| C3      | PRGLRKNLPVMVATV    | MMP14                          | E11     | AFKNLPVMVATV       | Plasmin                     | H7      | AVRWLLTANLPVMVATV       | MMP9        |
| C4      | PRGLRPNLPVMVATV    | MMP15/16/24/25                 | E12     | GGRNLPVMVATV       | Plasmin / TMPRSS2           | H8      | RPLALWRSNLPVMVATV       | MMP7        |
| C5      | PRHLRNNLPVMVATV    | MMP15/16/24/25                 | F1      | HSSKLQNLVPVMVATV   | PSA                         | H9      | PVGLIGNLPVMVATV         | MMP2/9      |
| C6      | PRWLRSNLPVMVATV    | MMP15/16/24/25                 | F2      | SSKYQNLVPVMVATV    | PSA                         | H10     | GGGRRNLPVMVATV          | uPA         |
| C7      | GPLGLWAGGNLPVMVATV | MMP2                           | F3      | LVPRGSNLPVMVATV    | Thrombin                    | H11     | GGGGGNLPVMVATV          | Control     |
| C8      | GPLGVRGNLPVMVATV   | MMP2                           | F4      | RNLVPMVATV         | Trypsin                     | H12     | V{Cit}GSV{Cit}NLPVMVATV | Cathepsin B |

**Table S2.** Peptide sequences used for 96 APEC screening and the protease previously published to cleave the peptide.

**Table S3**

| Peptide | Sequence  | Protease       | Reference from Table S2 |
|---------|-----------|----------------|-------------------------|
| FRET1   | PRSFRLGK  | Cathepsin D    | A4                      |
| FRET2   | KPVLSYR   | MMP9           | E5                      |
| FRET3   | AANL      | Legumain       | B1                      |
| FRET4   | YLGRSYKV  | C1s            | A1                      |
| FRET5   | PRHLR     | MMP14          | C2                      |
| FRET6   | GPLGVRGK  | MMP2           | C8                      |
| FRET7   | GPLGLWAQ  | MMP (esp2/9)   | B9                      |
| FRET8   | PLGLYL    | MMP2/9         | G5                      |
| FRET9   | PRGLRK    | MMP15/16/24/25 | C3                      |
| FRET10  | GPQGIAGQR | MMP9           | E4                      |
| FRET11  | GPLGIAGQ  | MMP2/9         | D5                      |
| FRET12  | GGFRGG    | Cathepsin B    | -                       |
| FRET13  | FRFRFR    | Cathepsin B    | -                       |
| FRET14  | GGGGGG    | Uncleavable    | H11                     |
| FRET15  | AIPVSLR   | MMP2           | D2                      |
| FRET16  | KPAKFFRL  | ADAM28         | -                       |
| FRET17  | PRSAKELR  | MMP14          | -                       |

**Table S3.** Peptide sequences used for the FRET assay and the protease suggested to cleave the peptide.

**Table S4**

| Peptide | Sequence           | Protease              | Peptide | Sequence                | Protease             |
|---------|--------------------|-----------------------|---------|-------------------------|----------------------|
| #14     | CIPENFFGVSIINFEKL  | Matrilysin (MMP7)     | #42     | CPVGLIGSIINFEKL         | MMP2/9               |
| #15     | CLRELHLDNSIINFEKL  | Matrilysin (MMP7)     | #43     | CGPQGIWQSIINFEKL        | MMP2/9, MT1-MMP      |
| #19     | CGPLGLWAQSIINFEKL  | MMP (esp 2/9)         | #44     | CQPVGINTSSIINFEKL       | MMP3 (stromelysin-1) |
| #20     | CPLGLLGSIIINFEKL   | MMP1                  | #45     | CSTAVIVSASIINFEKL       | MMP3 (stromelysin-1) |
| #21     | CAAATSIAMSIINFEKL  | MMP11 (stromelysin-3) | #46     | CVASSSTAVSIINFEKL       | MMP3 (stromelysin-1) |
| #22     | CAAGAMFLESIIINFEKL | MMP11 (stromelysin-3) | #47     | CGPLGLARKSIINFEKL       | MMP7                 |
| #26     | CPRGLRPSIIINFEKL   | MMP15/16/24/25        | #48     | CRPLALWRSSIINFEKL       | MMP7                 |
| #27     | CPRHLRNSIIINFEKL   | MMP15/16/24/25        | #50     | CGPQGIAGQRSIIINFEKL     | MMP9                 |
| #30     | CGPLGVGRKSIINFEKL  | MMP2                  | #51     | CKPVSLYSRSIIINFEKL      | MMP9                 |
| #31     | CHPVGLLARSIIINFEKL | MMP2                  | #52     | CPLGMTSSIINFEKL         | MMP9                 |
| #32     | CKGPLGVGRSIINFEKL  | MMP2                  | #53     | CPRALMSIIINFEKL         | MMP9                 |
| #33     | CPLGLAGSIINFEKL    | MMP2                  | #54     | CGPLPLRSIIINFEKL        | MT1-MMP              |
| #34     | CPLGLWASIINFEKL    | MMP2                  | #59     | CGPQGARGQSIINFEKL       | MMP9                 |
| #35     | CPLGVRSIIINFEKL    | MMP2                  | #60     | CPLGLYSIIINFEKL         | MMP2/9               |
| #36     | CAIPVSLRSIIINFEKL  | MMP2                  | #61     | CPLGLYALSIIINFEKL       | MMP2/9               |
| #38     | CSGLDDSIINFEKL     | MMP2/9                | #67     | CGGGGSIINFEKL           | Control              |
| #40     | CGPLGMLSQSIINFEKL  | MMP2/9                | #68     | CV{Cit}GSV{Cit}SIINFEKL | Cathepsin B          |
| #41     | CPLGLSIINFEKL      | MMP2/9                | MMP14   | CPRSAKELRSIIINFEKL      | MMP14                |

**Table S4.** Peptide sequences incorporating the ovalbumin-derived SIINFEKL peptide used for APEC screening of the murine colorectal cell line SL-4.
