# Supplementary material
Source: PubMed Central journal article supplement (PMC7456461)
Supplement: NIHMS1612332-supplement-Supplemental_Figure_7.pdf [file NIHMS1612332-supplement-Supplemental_Figure_7.pdf]

## Supplementary Fig. 7: APEC binding to tumor cell surface essential for T cell recognition.

From: [Antibody-mediated delivery of viral epitopes to tumors harnesses CMV-specific T cells for cancer therapy](#)

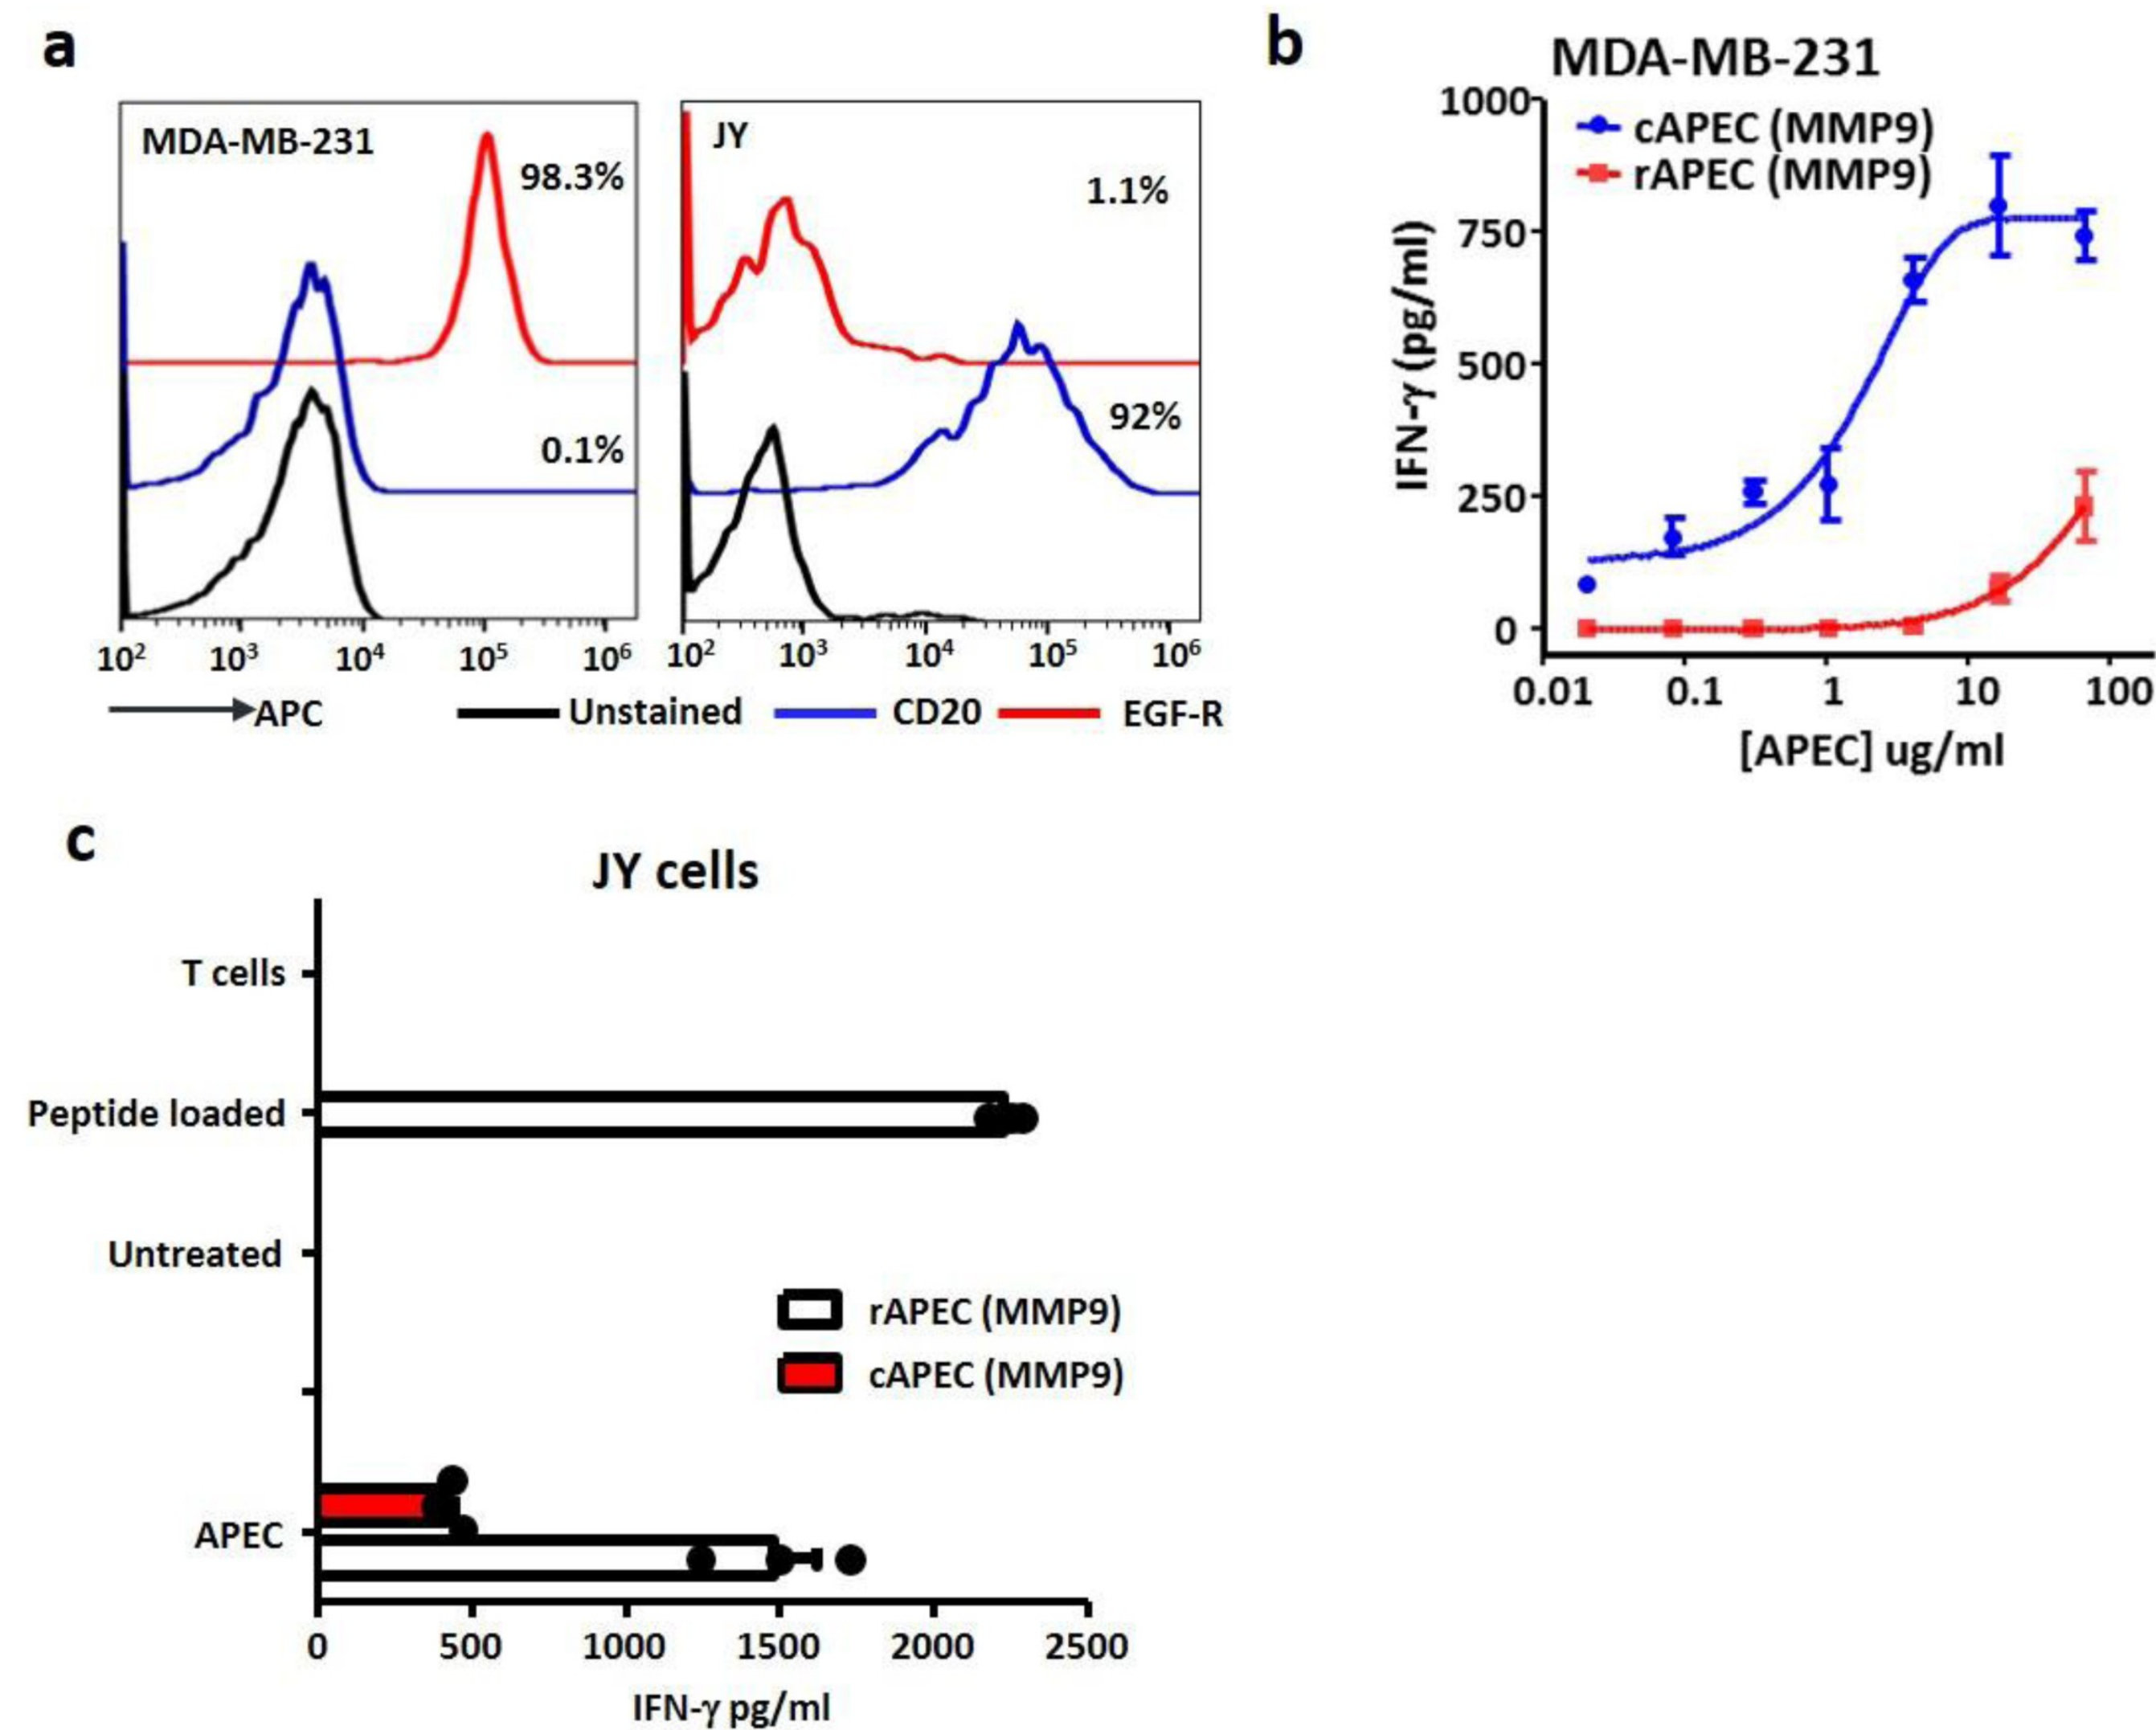

(a) Flow cytometric analysis of EGF-R and CD20 expression on MDA-MB-231 and JY tumor cell lines. Staining was repeated n=3. (b) Surface binding of APEC is required for antigenic reprogramming and can be inhibited by the pre-treatment with unconjugated antibody (n=3 independent samples). Data represented as mean and error bars represent standard error of the mean. (c) CD20+ tumor cells labelled with cAPEC or rAPEC (350nM) and demonstrating T cell activation only when bound by the anti-CD20 rAPEC. Peptide loaded (1μM) target cells were used to determine efficacy of T cells (n=3 independent samples). Data represented as mean and error bars represent standard error of the mean.

[Back to article page >](#)

Nature Biotechnology ISSN 1546-1696 (online)

nature research

[About us](#)

[Press releases](#)

[Press office](#)

[Contact us](#)

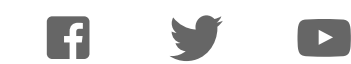

Discover content

[Journals A-Z](#)

[Articles by subject](#)

[Nano](#)

[Protocol Exchange](#)

[Nature Index](#)

Publish with us

[Guide to Authors](#)

[Guide to Referees](#)

[Editorial policies](#)

[Open access](#)

[Reprints & permissions](#)

Researcher services

[Research data](#)

[Language editing](#)

[Scientific editing](#)

[Nature Masterclasses](#)

[Nature Research Academies](#)

Libraries & institutions

[Librarian service & tools](#)

[Librarian portal](#)

[Open research](#)

Advertising & partnerships

[Advertising](#)

[Partnerships & Services](#)

[Media kits](#)

[Branded content](#)

Career development

[Nature Careers](#)

[Nature Conferences](#)

[Nature events](#)

Regional websites

[Nature China](#)

[Nature India](#)

[Nature Japan](#)

[Nature Korea](#)

[Nature Middle East](#)

SPRINGER NATURE

© 2020 Springer Nature Limited

[Privacy Policy](#)

[Use of cookies](#)

[Manage cookies](#)

[Legal notice](#)

[Accessibility statement](#)

[Terms & Conditions](#)
