# Supplementary material
Source: PubMed Central journal article supplement (PMC7456461)
Supplement: NIHMS1612332-supplement-Supplemental_Figure_13.pdf [file NIHMS1612332-supplement-Supplemental_Figure_13.pdf]

## Supplementary Fig. 13: In vivo T cell activation by APEC in orthotopic breast cancer model and the presence of peptide-specific T cells within tumors.

From: [Antibody-mediated delivery of viral epitopes to tumors harnesses CMV-specific T cells for cancer therapy](#)

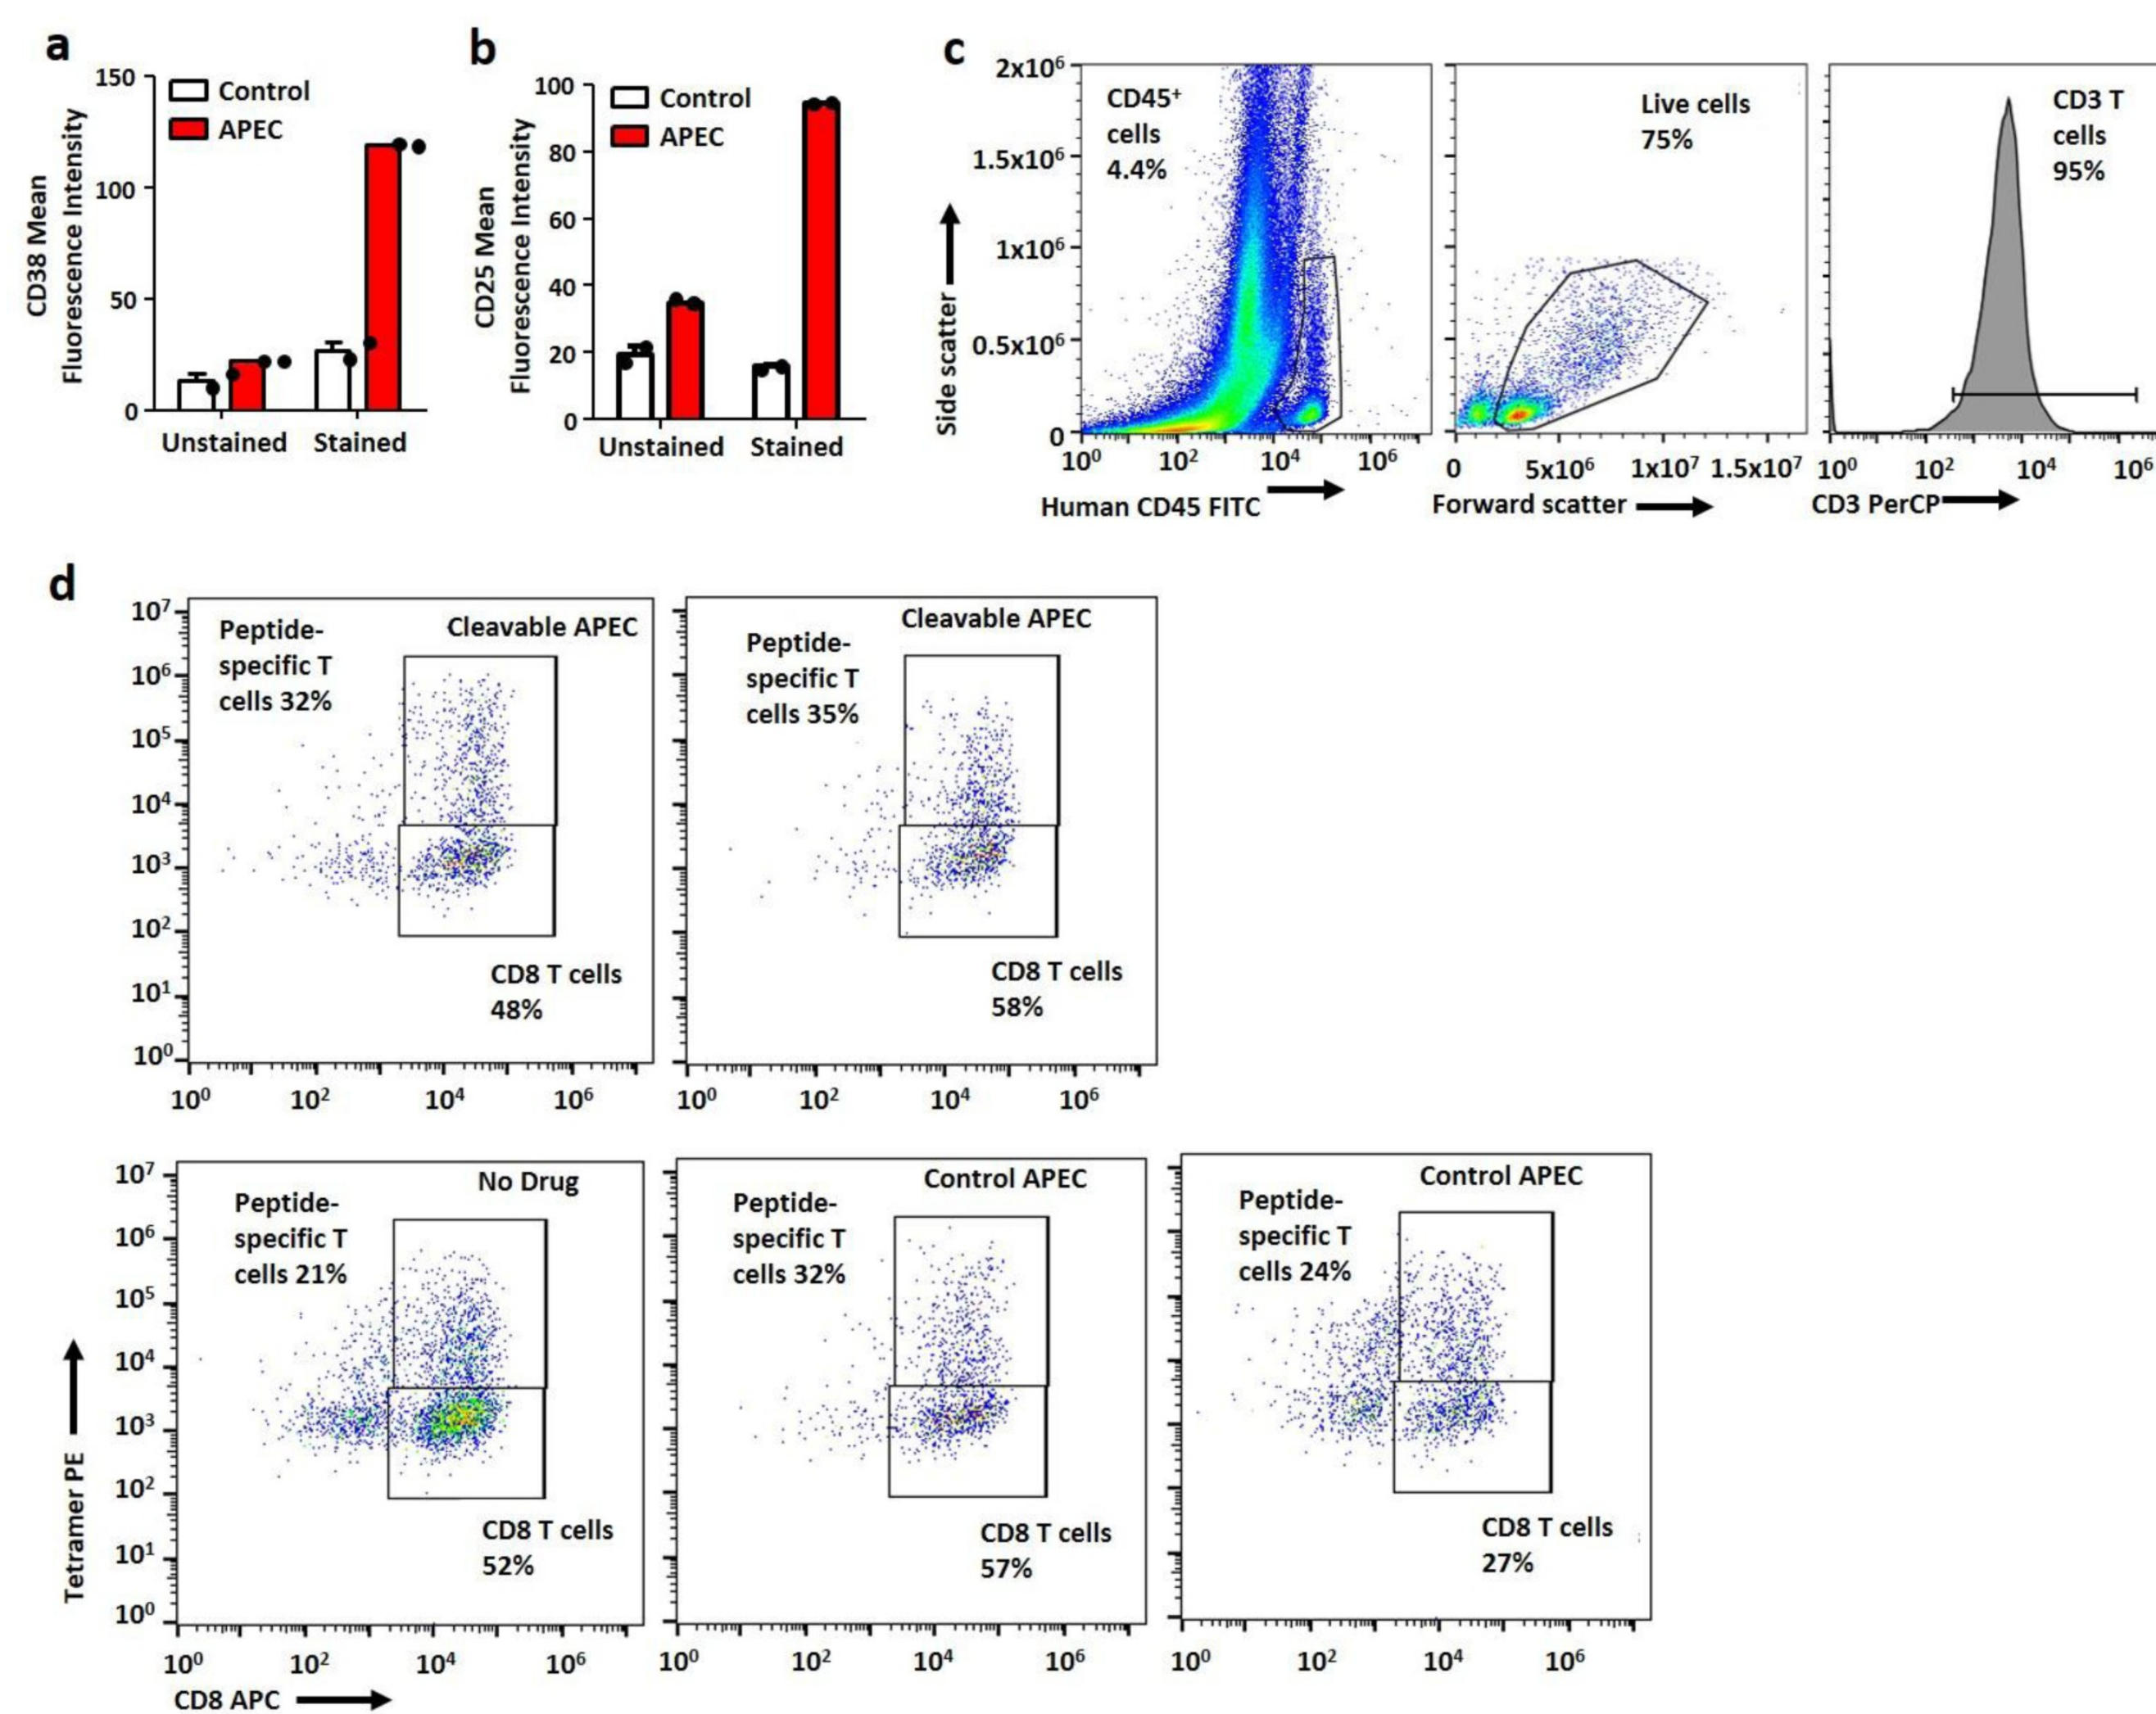

Breast cancer tumor-bearing mice were injected intratumorally with freshly isolated peptide-specific CMV-CTL and 24h post-injection, tumors were resected and T cells isolated. Flow cytometric analysis of intratumoral CD3<sup>+</sup> T cells was undertaken for the presence of T cell activation markers (a) CD38 (n=2 independent samples) and (b) CD25 (n=2 independent samples). Data represented as mean and error bars represent standard error of the mean. (c) Gating strategy to select human T cells from the excised tumor sample. Firstly, CD45<sup>+</sup> was used to gate human lymphocytes before live cells were gated using forward and side scatter. T cells were then gated using CD3. (d) Peptide-specific T cells were labelled using HLA-peptide tetramer complexes conjugated to phycoerythrin (PE) and the cells were co-labeled with CD8 APC (data from single experiment).

[Back to article page >](#)

Nature Biotechnology ISSN 1546-1696 (online)

nature research

[About us](#)

[Press releases](#)

[Press office](#)

[Contact us](#)

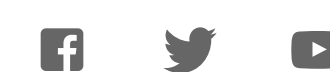

Discover content

[Journals A-Z](#)

[Articles by subject](#)

[Nano](#)

[Protocol Exchange](#)

[Nature Index](#)

Publish with us

[Guide to Authors](#)

[Guide to Referees](#)

[Editorial policies](#)

[Open access](#)

[Reprints & permissions](#)

Researcher services

[Research data](#)

[Language editing](#)

[Scientific editing](#)

[Nature Masterclasses](#)

[Nature Research Academies](#)

Libraries & institutions

[Librarian service & tools](#)

[Librarian portal](#)

[Open research](#)

Advertising & partnerships

[Advertising](#)

[Partnerships & Services](#)

[Media kits](#)

[Branded content](#)

Career development

[Nature Careers](#)

[Nature Conferences](#)

[Nature events](#)

Regional websites

[Nature China](#)

[Nature India](#)

[Nature Japan](#)

[Nature Korea](#)

[Nature Middle East](#)

SPRINGER NATURE

© 2020 Springer Nature Limited

[Privacy Policy](#)

[Use of cookies](#)

[Manage cookies](#)

[Legal notice](#)

[Accessibility statement](#)

[Terms & Conditions](#)
